# Supplementary material for: The Hippo/YAP pathway interacts with EGFR signaling and HPV oncoproteins to regulate cervical cancer progression
Source: PubMed Central journal article supplement (PMC4644376; doi:10.15252/emmm.201404976), 2015-09-28
Supplement: emmm0007-1426-sd4.pdf [file emmm0007-1426-sd4.pdf]

# Source Data Figures

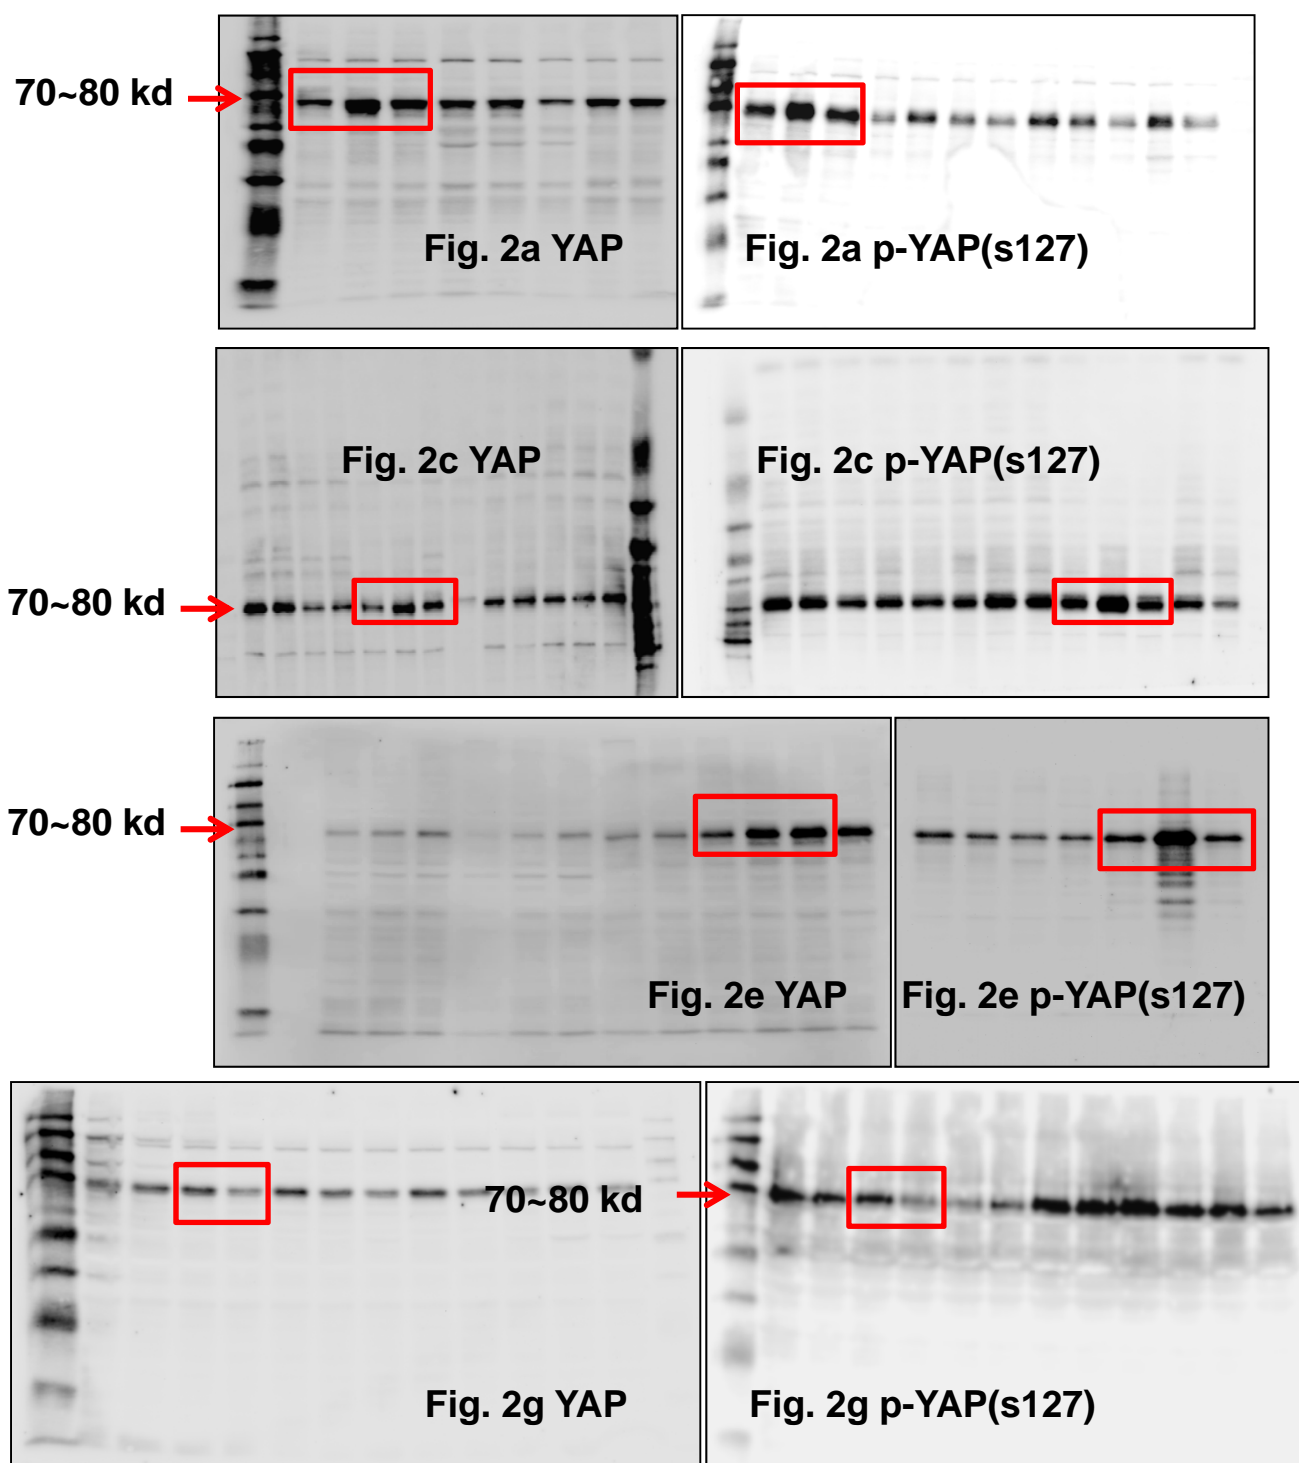

Source Data for Figure 2
