# Supplementary material for: The Hippo/YAP pathway interacts with EGFR signaling and HPV oncoproteins to regulate cervical cancer progression
Source: PubMed Central journal article supplement (PMC4644376; doi:10.15252/emmm.201404976), 2015-09-28

## Source Data for Figures

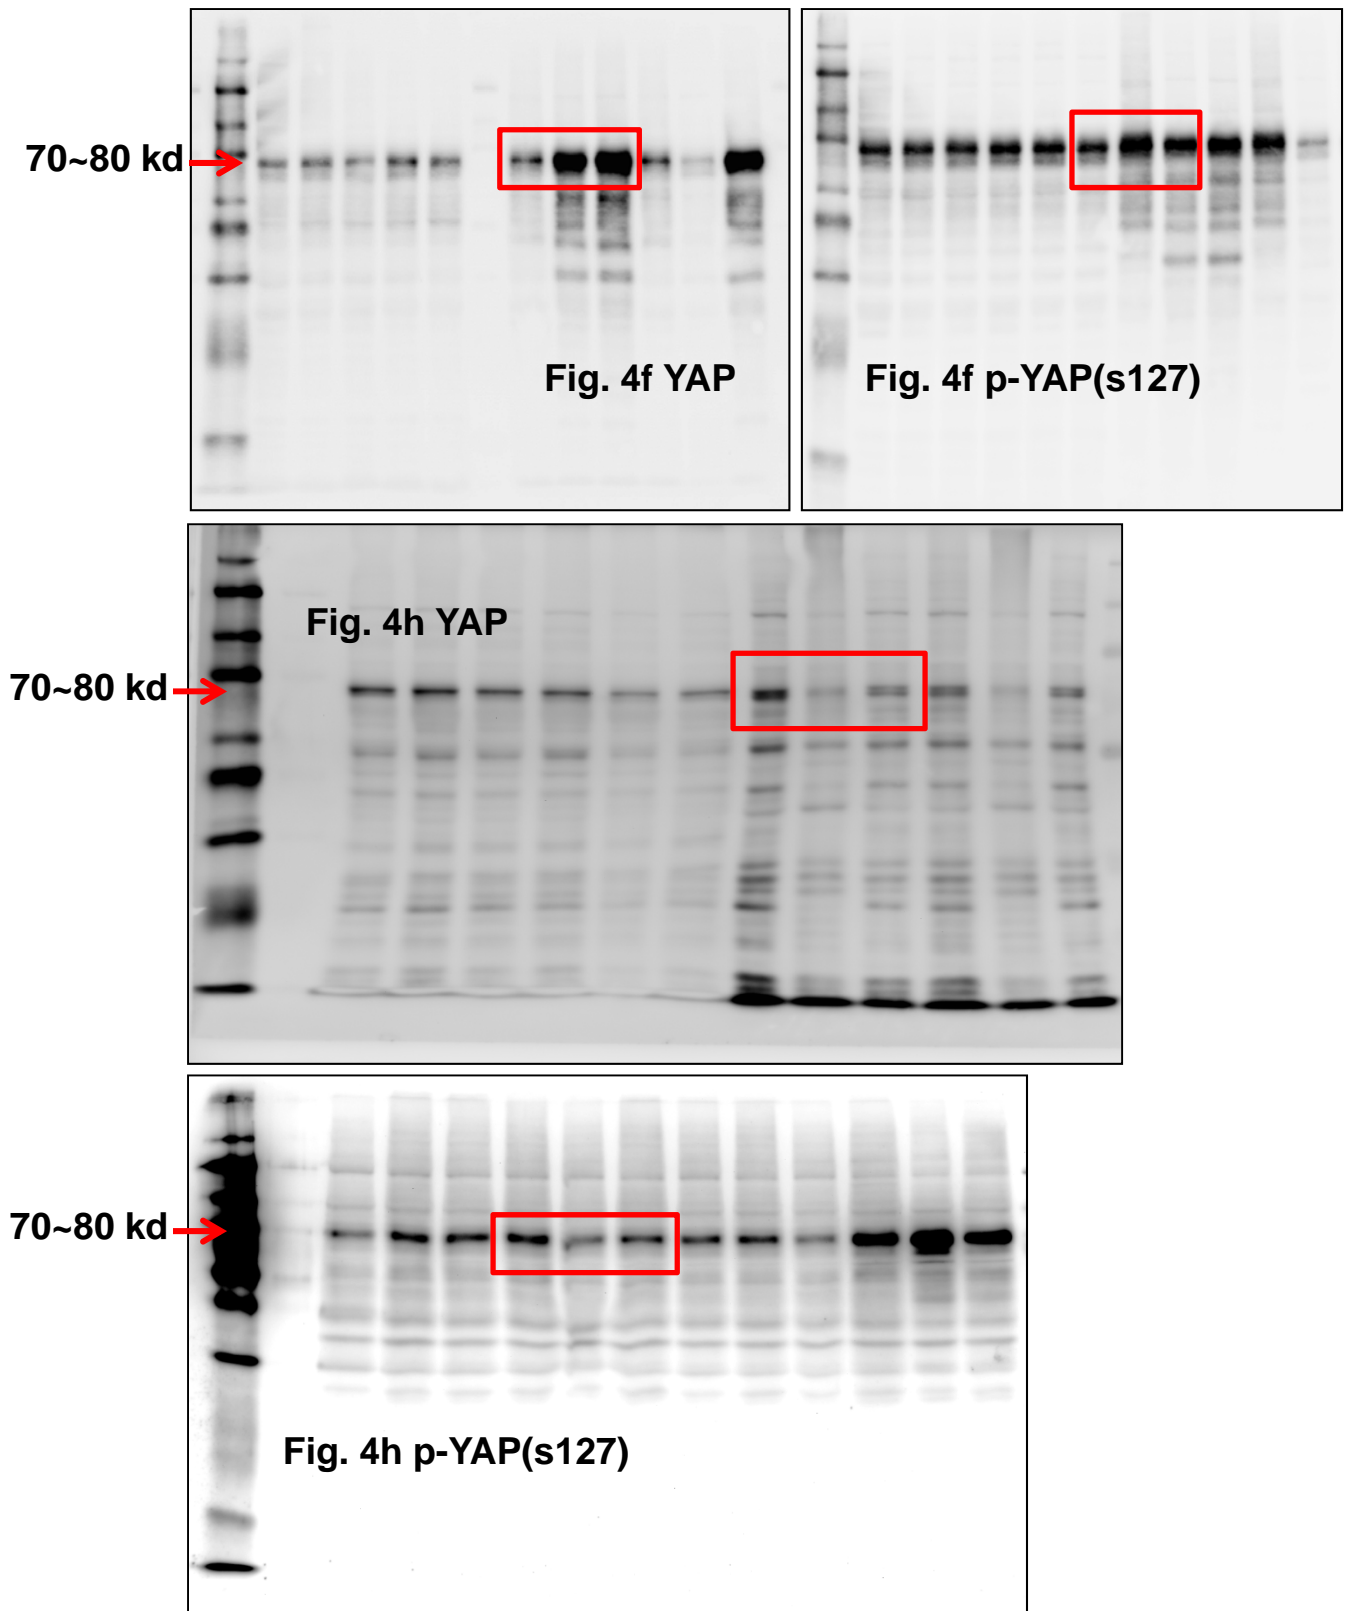

Supplement: emmm0007-1426-sd5.pdf [file emmm0007-1426-sd5.pdf]
